# Supplementary material for: Molecular Epidemiology of Cryptosporidium spp. in an Agricultural Area of Northern Vietnam: A Community Survey
Source: Research Square preprint supplement (doi:10.21203/rs.3.rs-117768/v1), 2020-12-04
Supplement: Supplementary file 1 [file 1c81c76916e95407a720b5e6.docx]

**Additional file 1: Table S1.** List of GenBank database accession numbers of reference sequences of different *Cryptosporidium* spp. used in phylogenetic analyses, and recognized hosts of *Cryptosporidium* spp.

*modified from Zahedi et al. 2020
