# Supplementary material for: Molecular Epidemiology of Cryptosporidium spp. in an Agricultural Area of Northern Vietnam: A Community Survey
Source: Research Square preprint supplement (doi:10.21203/rs.3.rs-117768/v1), 2020-12-04
Supplement: Supplementary file 2 [file 1d0dcd3e84e2a1e959cefd84.docx]

**Additional file 4: Table S4**. Characterization of *Cryptosporidium* spp. sequences at *GP60* gene obtained from stool samples
