# Supplementary material for: Molecular Epidemiology of Cryptosporidium spp. in an Agricultural Area of Northern Vietnam: A Community Survey
Source: Research Square preprint supplement (doi:10.21203/rs.3.rs-117768/v1), 2020-12-04
Supplement: Supplementary file 3 [file 2316b9867cd97ebd827e3b1c.docx]

**Additional file 3: Table S3**. Characterization of *Cryptosporidium* spp. sequences at *SSU-rRAN* gene obtained from stool samples
